# Supplementary material for: Identification of prognostic aging-related genes associated with immunosuppression and inflammation in head and neck squamous cell carcinoma
Source: PubMed Central journal article supplement (PMC7803584; doi:10.18632/aging.104199), 2020-11-24
Supplement: aging-12-104199-s003.pdf [file aging-12-104199-s003.pdf]

## SUPPLEMENTARY TABLE

**Supplementary Table 2. Forty-one differentially expressed genes in the aging-related gene set.**

| Gene     | ConMean   | TreatMean | logFC     | pValue     | FDR      |
|----------|-----------|-----------|-----------|------------|----------|
| APP      | 39.247603 | 103.3061  | 1.3962495 | 4.95E-13   | 9.04E-13 |
| BAK1     | 10.175959 | 23.5007   | 1.2075388 | 1.44E-13   | 3.18E-13 |
| BUB1B    | 3.1727858 | 6.922003  | 1.1254394 | 2.82E-18   | 1.48E-17 |
| C1QA     | 27.634554 | 61.46906  | 1.1533872 | 0.00116444 | 0.001223 |
| CCNA2    | 5.3256053 | 13.96796  | 1.391104  | 3.40E-17   | 1.10E-16 |
| CDKN2A   | 1.3581066 | 10.93876  | 3.0097805 | 0.00022727 | 0.000258 |
| DDIT3    | 5.1889558 | 11.92465  | 1.2004307 | 2.80E-10   | 3.66E-10 |
| E2F1     | 2.4063142 | 10.09535  | 2.0687939 | 6.24E-24   | 2.62E-22 |
| EGFR     | 9.4966372 | 29.37689  | 1.6291928 | 3.37E-07   | 3.93E-07 |
| EGR1     | 177.67804 | 76.10728  | -1.223159 | 3.95E-09   | 4.88E-09 |
| FEN1     | 6.047823  | 19.74638  | 1.7071004 | 1.23E-22   | 1.73E-21 |
| FOS      | 258.19873 | 106.0324  | -1.283977 | 2.88E-10   | 3.66E-10 |
| FOXM1    | 3.1564422 | 14.86446  | 2.2354956 | 3.97E-23   | 8.34E-22 |
| H2AFX    | 12.914618 | 29.94685  | 1.2133993 | 4.93E-11   | 6.90E-11 |
| HIF1A    | 20.036985 | 49.84471  | 1.314775  | 1.95E-12   | 3.41E-12 |
| HMGB2    | 12.80035  | 33.52158  | 1.3889068 | 3.52E-12   | 5.68E-12 |
| HOXB7    | 1.9075584 | 6.730141  | 1.8189094 | 9.78E-17   | 2.74E-16 |
| HSPD1    | 29.136663 | 59.11269  | 1.0206322 | 2.16E-13   | 4.54E-13 |
| IGFBP3   | 14.93991  | 52.80921  | 1.821618  | 4.89E-09   | 5.87E-09 |
| IL2RG    | 5.2557188 | 10.9742   | 1.0621562 | 0.00531744 | 0.005447 |
| IL7R     | 3.425877  | 8.258084  | 1.2693337 | 1.29E-11   | 1.86E-11 |
| LMNB1    | 6.6300363 | 15.59522  | 1.234015  | 1.14E-11   | 1.71E-11 |
| MIF      | 17.602226 | 43.2198   | 1.2959346 | 4.06E-13   | 8.12E-13 |
| NRG1     | 2.3744663 | 5.626124  | 1.244538  | 7.89E-12   | 1.23E-11 |
| NUDT1    | 5.2909544 | 13.01608  | 1.2986956 | 4.57E-18   | 2.02E-17 |
| PCNA     | 24.006157 | 72.29586  | 1.5905086 | 4.81E-18   | 2.02E-17 |
| PDGFRB   | 5.6199417 | 14.75284  | 1.3923654 | 6.67E-11   | 9.04E-11 |
| PLAU     | 5.8109266 | 82.76741  | 3.8322227 | 3.61E-21   | 3.03E-20 |
| PML      | 5.9293315 | 13.05956  | 1.139165  | 1.58E-14   | 3.89E-14 |
| POLD1    | 4.3692004 | 9.422398  | 1.108725  | 4.68E-20   | 2.81E-19 |
| PRKDC    | 8.5063936 | 19.21432  | 1.1755628 | 4.48E-13   | 8.56E-13 |
| PTGS2    | 3.8293036 | 10.52787  | 1.4590596 | 0.00116031 | 0.001223 |
| RAD51    | 2.9088248 | 6.234649  | 1.0998719 | 5.46E-22   | 5.73E-21 |
| RECQL4   | 3.5042193 | 8.516179  | 1.2811132 | 3.91E-17   | 1.17E-16 |
| SERPINE1 | 5.2360086 | 90.50704  | 4.1114907 | 3.95E-15   | 1.04E-14 |
| SHC1     | 13.929559 | 33.40669  | 1.2619875 | 1.14E-17   | 4.33E-17 |
| TCF3     | 6.2120472 | 14.51215  | 1.2241211 | 4.46E-21   | 3.12E-20 |

|       |           |          |           |            |          |
|-------|-----------|----------|-----------|------------|----------|
| TOP2A | 6.0594999 | 22.28673 | 1.8789141 | 2.72E-17   | 9.52E-17 |
| TP63  | 18.548258 | 54.84206 | 1.563999  | 6.12E-14   | 1.43E-13 |
| UCHL1 | 2.391086  | 13.05015 | 2.4483281 | 0.00077289 | 0.000854 |
| VEGFA | 4.337274  | 9.386313 | 1.1137699 | 2.10E-12   | 3.53E-12 |

---
