# Supplementary material for: Identification of prognostic aging-related genes associated with immunosuppression and inflammation in head and neck squamous cell carcinoma
Source: PubMed Central journal article supplement (PMC7803584; doi:10.18632/aging.104199), 2020-11-24
Supplement: aging-12-104199-s006.pdf [file aging-12-104199-s006.pdf]

## SUPPLEMENTARY TABLE

Supplementary Table 5. The top thirty enriched pathways of the high and low risk scores.

| NAME                                                            | SIZE | NES    | ES        | NOM p-val | FDR q-val |
|-----------------------------------------------------------------|------|--------|-----------|-----------|-----------|
| KEGG_FOCAL_ADHESION                                             | 199  | 1.791  | 0.540501  | 0.010     | 0.621     |
| KEGG_WNT_SIGNALING_PATHWAY                                      | 150  | 1.787  | 0.467608  | 0.008     | 0.325     |
| KEGG_PROTEIN_EXPORT                                             | 24   | 1.715  | 0.626685  | 0.023     | 0.391     |
| KEGG_BASAL_TRANSCRIPTION_FACTORS                                | 35   | 1.677  | 0.565968  | 0.028     | 0.391     |
| KEGG_ADHERENS_JUNCTION                                          | 73   | 1.677  | 0.500147  | 0.036     | 0.313     |
| KEGG_TGF_BETA_SIGNALING_PATHWAY                                 | 85   | 1.674  | 0.492573  | 0.020     | 0.267     |
| KEGG_SMALL_CELL_LUNG_CANCER                                     | 84   | 1.661  | 0.488079  | 0.022     | 0.250     |
| KEGG_ECM_RECEPTOR_INTERACTION                                   | 84   | 1.659  | 0.584678  | 0.047     | 0.221     |
| KEGG_ERBB_SIGNALING_PATHWAY                                     | 87   | 1.658  | 0.460301  | 0.024     | 0.197     |
| KEGG_RENAL_CELL_CARCINOMA                                       | 70   | 1.650  | 0.456580  | 0.028     | 0.189     |
| KEGG_REGULATION_OF_ACTIN_CYTOSKELETON                           | 213  | 1.625  | 0.422086  | 0.030     | 0.204     |
| KEGG_PATHWAYS_IN_CANCER                                         | 325  | 1.619  | 0.406490  | 0.022     | 0.193     |
| KEGG_GLYCOSAMINOGLYCAN_BIOSYNTHESIS_CHONDROITIN_SULFATE         | 22   | 1.618  | 0.620100  | 0.051     | 0.180     |
| KEGG_EPITHELIAL_CELL_SIGNALING_IN_HELICOBACTER_PYLORI_INFECTION | 68   | 1.588  | 0.432624  | 0.028     | 0.201     |
| KEGG_O_GLYCAN_BIOSYNTHESIS                                      | 30   | 1.566  | 0.518195  | 0.047     | 0.214     |
| KEGG_GAP_JUNCTION                                               | 90   | 1.534  | 0.413798  | 0.063     | 0.242     |
| KEGG_GALACTOSE_METABOLISM                                       | 26   | 1.520  | 0.476869  | 0.042     | 0.247     |
| KEGG_UBIQUITIN_MEDIATED_PROTEOLYSIS                             | 134  | 1.512  | 0.414400  | 0.065     | 0.245     |
| KEGG_NITROGEN_METABOLISM                                        | 23   | 1.511  | 0.525666  | 0.044     | 0.233     |
| KEGG_RNA_DEGRADATION                                            | 59   | 1.506  | 0.465151  | 0.102     | 0.228     |
| KEGG_BASAL_CELL_CARCINOMA                                       | 55   | 1.464  | 0.458399  | 0.079     | 0.272     |
| KEGG_HEDGEHOG_SIGNALING_PATHWAY                                 | 56   | 1.445  | 0.434513  | 0.076     | 0.288     |
| KEGG_NOD_LIKE_RECEPTOR_SIGNALING_PATHWAY                        | 62   | 1.441  | 0.427602  | 0.099     | 0.282     |
| KEGG_VIBRIO_CHOLERAE_INFECTION                                  | 54   | 1.420  | 0.391865  | 0.074     | 0.298     |
| KEGG_GLIOMA                                                     | 65   | 1.411  | 0.397358  | 0.088     | 0.298     |
| KEGG_PANCREATIC_CANCER                                          | 70   | 1.401  | 0.404685  | 0.111     | 0.303     |
| KEGG_AXON_GUIDANCE                                              | 129  | 1.391  | 0.379621  | 0.094     | 0.305     |
| KEGG_INOSITOL_PHOSPHATE_METABOLISM                              | 54   | 1.385  | 0.430061  | 0.128     | 0.302     |
| KEGG_AMINOACYL_TRNA_BIOSYNTHESIS                                | 22   | 1.378  | 0.517645  | 0.162     | 0.300     |
| KEGG_N_GLYCAN_BIOSYNTHESIS                                      | 46   | 1.367  | 0.444909  | 0.128     | 0.305     |
| KEGG_PRIMARY_IMMUNODEFICIENCY                                   | 35   | -2.102 | -0.805314 | 0.000     | 0.015     |
| KEGG_INTESTINAL_IMMUNE_NETWORK_FOR_IGA_PRODUCTION               | 46   | -2.047 | -0.760872 | 0.000     | 0.016     |
| KEGG_AUTOIMMUNE_THYROID_DISEASE                                 | 50   | -2.021 | -0.720466 | 0.002     | 0.018     |

|                                                |     |        |           |       |       |
|------------------------------------------------|-----|--------|-----------|-------|-------|
| KEGG_ASTHMA                                    | 28  | -1.964 | -0.792507 | 0.002 | 0.028 |
| KEGG_ARACHIDONIC_ACID_METABOLISM               | 58  | -1.916 | -0.542208 | 0.002 | 0.040 |
| KEGG_ALLOGRAFT_REJECTION                       | 35  | -1.885 | -0.807991 | 0.004 | 0.046 |
| KEGG_SYSTEMIC_LUPUS_ERYTHEMATOSUS              | 55  | -1.813 | -0.671447 | 0.026 | 0.080 |
| KEGG_CELL_ADHESION_MOLECULES_CAMS              | 131 | -1.797 | -0.547984 | 0.012 | 0.080 |
| KEGG_TYPE_I_DIABETES_MELLITUS                  | 41  | -1.783 | -0.693100 | 0.028 | 0.081 |
| KEGG_HEMATOPOIETIC_CELL_LINEAGE                | 85  | -1.761 | -0.568026 | 0.024 | 0.088 |
| KEGG_NATURAL_KILLER_CELL_MEDIATED_CYTOTOXICITY | 132 | -1.733 | -0.512719 | 0.016 | 0.103 |
| KEGG_GRAFT_VERSUS_HOST_DISEASE                 | 37  | -1.708 | -0.731792 | 0.047 | 0.115 |
| KEGG_LEISHMANIA_INFECTION                      | 70  | -1.676 | -0.553619 | 0.054 | 0.138 |
| KEGG_FATTY_ACID_METABOLISM                     | 42  | -1.668 | -0.531167 | 0.024 | 0.135 |
| KEGG_CYTOKINE_CYTOKINE_RECEPTOR_INTERACTION    | 264 | -1.655 | -0.446398 | 0.033 | 0.139 |
| KEGG_PARKINSONS_DISEASE                        | 127 | -1.650 | -0.547933 | 0.053 | 0.134 |
| KEGG_ANTIGEN_PROCESSING_AND_PRESENTATION       | 81  | -1.648 | -0.565163 | 0.064 | 0.127 |
| KEGG_ALZHEIMERS_DISEASE                        | 165 | -1.641 | -0.458914 | 0.043 | 0.126 |
| KEGG_T_CELL_RECEPTOR_SIGNALING_PATHWAY         | 108 | -1.633 | -0.493802 | 0.042 | 0.126 |
| KEGG_PEROXISOME                                | 78  | -1.621 | -0.446708 | 0.030 | 0.129 |
| KEGG_TRYPTOPHAN_METABOLISM                     | 39  | -1.612 | -0.505357 | 0.029 | 0.130 |
| KEGG_CARDIAC_MUSCLE_CONTRACTION                | 78  | -1.610 | -0.502809 | 0.028 | 0.125 |
| KEGG_OXIDATIVE_PHOSPHORYLATION                 | 131 | -1.607 | -0.542387 | 0.070 | 0.123 |
| KEGG_B_CELL_RECEPTOR_SIGNALING_PATHWAY         | 75  | -1.594 | -0.491494 | 0.048 | 0.128 |
| KEGG_LINOLEIC_ACID_METABOLISM                  | 29  | -1.593 | -0.533346 | 0.045 | 0.124 |
| KEGG_BUTANOATE_METABOLISM                      | 34  | -1.590 | -0.503871 | 0.038 | 0.120 |
| KEGG_ALDOSTERONE_REGULATED_SODIUM_REABSORPTION | 42  | -1.586 | -0.471743 | 0.050 | 0.119 |
| KEGG_CHEMOKINE_SIGNALING_PATHWAY               | 188 | -1.564 | -0.442850 | 0.051 | 0.131 |
| KEGG_VALINE_LEUCINE_AND_ISOLEUCINE_DEGRADATION | 43  | -1.555 | -0.524273 | 0.056 | 0.134 |
| KEGG_FC_EPSILON_R1_SIGNALING_PATHWAY           | 79  | -1.553 | -0.432609 | 0.036 | 0.132 |
