# Supplementary material for: Identification of prognostic aging-related genes associated with immunosuppression and inflammation in head and neck squamous cell carcinoma
Source: Aging (Albany NY). 2020 Nov 24;12(24):25778–804. doi: 10.18632/aging.104199 (PMC7803584; doi:10.18632/aging.104199)
Supplement: Supplementary Table 3 [file aging-12-104199-s004.xlsx]

## Sheet: Table S3
Supplementary Table 3. Information for the TCGA training set.
Information for the TCGA training set.
ID	Age	Sex	OSyears	OSstatus	DSFyears	DSFstatus	Grade	Stage	T	N	M	HPV
TCGA-UF-A7JV	62	Female	2.96	Dead	1.81	Recurred or Progressed	G2	Stage IV	T4	N2	M0	NA
TCGA-T3-A92N	79	Male	3.12	Dead	1.51	Recurred or Progressed	G3	Stage IV	T1	N1	M1	NA
TCGA-CQ-5334	87	Male	4.24	Dead	1.64	Recurred or Progressed	G2	Stage IV	T4	N2	M0	NA
TCGA-BB-4227	66	Male	4.4	Alive	2.79	Recurred or Progressed	G2	Stage IV	T4	N2	M0	NA
TCGA-CV-6936	68	Male	5.45	Dead	5.16	Recurred or Progressed	G2	Stage IV	T4	N2	M0	NA
TCGA-BA-A6DD	44	Male	5.68	Dead	3.15	Recurred or Progressed	G2	Stage IV	T4	N2	M0	Negative
TCGA-BA-A6DB	24	Female	7.1	Alive	6.83	Recurred or Progressed	G1	Stage II	T2	N0	M0	Negative
TCGA-CN-5363	48	Male	8.31	Dead	1.74	Recurred or Progressed	G3	Stage IV	T4	N3	M0	NA
TCGA-BB-A6UO	61	Female	8.8	Dead	6.96	Recurred or Progressed	G2	Stage IV	T3	N2	MX	NA
TCGA-BB-4224	52	Male	9.13	Alive	5.75	Recurred or Progressed	G2	Stage III	T3	N0	M0	NA
TCGA-CR-6493	69	Male	9.26	Dead	8.11	Recurred or Progressed	G2	Stage IV	T3	N2	M0	NA
TCGA-BA-4075	49	Male	9.3	Dead	7.75	Recurred or Progressed	G2	Stage IV	T4	N1	M0	NA
TCGA-QK-A6II	52	Male	9.33	Dead	5.78	Recurred or Progressed	G2	Stage III	T3	N0	M0	NA
TCGA-CV-6441	60	Male	9.59	Dead	3.12	Recurred or Progressed	G3	Stage III	T3	N0	M0	NA
TCGA-D6-6517	59	Male	9.59	Alive	5.29	Recurred or Progressed	G2	Stage III	T3	N0	M0	NA
TCGA-BB-A5HY	64	Male	10.55	Dead	7.56	Recurred or Progressed	G3	Stage IV	T3	N2	M0	NA
TCGA-BA-A6DI	62	Male	11.04	Dead	8.74	Recurred or Progressed	G2	Stage III	T3	N0	M0	Negative
TCGA-CQ-5333	74	Male	11.2	Dead	5.78	Recurred or Progressed	G3	Stage I	T1	N0	M0	NA
TCGA-CN-6998	53	Male	11.73	Dead	8.02	Recurred or Progressed	G2	Stage IV	T4	N1	M0	Negative
TCGA-CN-5366	51	Male	11.83	Dead	9.07	Recurred or Progressed	G2	Stage IV	T4	N2	M0	NA
TCGA-CN-5359	59	Male	12.39	Dead	11.7	Recurred or Progressed	G2	Stage IV	T4	N1	M0	Negative
TCGA-CN-4736	70	Female	12.98	Dead	6.87	Recurred or Progressed	G2	Stage II	T2	N0	M0	NA
TCGA-P3-A6T6	53	Male	12.98	Dead	8.97	Recurred or Progressed	G3	Stage IV	T4	N0	M0	NA
TCGA-D6-6515	82	Female	13.24	Dead	6.41	Recurred or Progressed	G3	Stage II	T2	N0	M0	NA
TCGA-CQ-6225	65	Male	13.24	Dead	5.91	Recurred or Progressed	G2	Stage II	T2	N0	M0	NA
TCGA-H7-7774	75	Female	13.37	Alive	8.28	Recurred or Progressed	G2	Stage III	T3	N0	M0	NA
TCGA-BA-A6DJ	62	Male	13.37	Dead	7.88	Recurred or Progressed	G2	Stage IV	T4	N2	M0	Negative
TCGA-UF-A7JK	59	Male	13.93	Dead	11.2	Recurred or Progressed	G2	Stage IV	T4	N0	M0	NA
TCGA-DQ-7588	66	Male	14.03	Dead	10.61	Recurred or Progressed	G3	Stage III	T2	N1	M0	Negative
TCGA-CQ-A4CG	78	Female	14.13	Dead	11.5	Recurred or Progressed	G2	Stage II	T2	N0	M0	NA
TCGA-QK-A8Z9	56	Male	14.75	Dead	6.73	Recurred or Progressed	G2	Stage IV	T4	N2	M0	NA
TCGA-CV-6950	64	Male	15.08	Dead	8.48	Recurred or Progressed	G2	Stage IV	T3	N2	M0	NA
TCGA-MT-A7BN	74	Male	15.41	Alive	5.88	Recurred or Progressed	G3	Stage IV	T2	N2	M0	NA
TCGA-BA-6868	53	Male	15.51	Dead	11.3	Recurred or Progressed	G2	Stage IV	T3	N3	M0	NA
TCGA-P3-A5Q6	49	Male	15.77	Dead	12.22	Recurred or Progressed	G3	Stage III	T3	N0	M0	NA
TCGA-BA-5555	54	Male	17.08	Alive	8.15	Recurred or Progressed	G2	Stage IV	T2	N2	M0	NA
TCGA-CN-A49A	60	Male	17.28	Dead	12.19	Recurred or Progressed	G2	Stage IV	T4	N0	M0	NA
TCGA-UF-A7JC	42	Male	17.94	Dead	7.52	Recurred or Progressed	G1	Stage III	T3	N1	M0	NA
TCGA-MZ-A7D7	51	Male	17.97	Alive	11.14	Recurred or Progressed	NA	Stage IV	T3	N2	M0	Negative
TCGA-F7-A61S	62	Male	18.92	Alive	7	Recurred or Progressed	G1	NA	TX	NX	MX	NA
TCGA-P3-A6T0	47	Female	18.99	Alive	11.99	Recurred or Progressed	G2	Stage IV	T4	N2	M0	NA
TCGA-CV-7433	49	Male	19.74	Dead	19.19	Recurred or Progressed	G3	Stage IV	T4	N1	M0	NA
TCGA-CV-A6K0	58	Male	19.91	Alive	4.8	Recurred or Progressed	G3	Stage II	T2	N0	M0	NA
TCGA-BB-8601	84	Male	20.5	Alive	20.5	Recurred or Progressed	G2	Stage II	T2	N0	M0	NA
TCGA-CV-A45P	82	Female	20.99	Alive	20.99	Recurred or Progressed	G2	Stage II	T2	N0	M0	NA
TCGA-QK-A6VB	66	Male	21.06	Alive	20.14	Recurred or Progressed	G2	Stage IV	T4	N0	M0	NA
TCGA-QK-A6IH	65	Female	21.45	Alive	8.15	Recurred or Progressed	G2	Stage IV	T4	N1	M0	NA
TCGA-CQ-A4C9	56	Male	23.23	Alive	23.23	Recurred or Progressed	G2	NA	TX	NX	MX	NA
TCGA-CV-A6JZ	68	Male	23.46	Alive	12.91	Recurred or Progressed	G2	Stage IV	T4	N0	M0	NA
TCGA-BA-5151	72	Male	23.72	Alive	16.98	Recurred or Progressed	G1	Stage IV	T4	N0	M0	NA
TCGA-CN-6013	56	Male	23.88	Dead	20.2	Recurred or Progressed	G3	Stage IV	T4	N2	M0	Negative
TCGA-CN-A498	61	Female	25.39	Dead	18.17	Recurred or Progressed	G1	Stage II	T2	N0	M0	NA
TCGA-CV-7418	62	Male	25.92	Dead	16.23	Recurred or Progressed	G2	Stage IV	T4	N0	M0	NA
TCGA-CR-7382	49	Male	26.15	Alive	20.17	Recurred or Progressed	G2	Stage IV	T2	N2	M0	NA
TCGA-BA-A6D8	59	Male	27.92	Alive	27.89	Recurred or Progressed	G2	Stage IV	T4	N2	M0	Negative
TCGA-BA-A4IF	59	Male	29.4	Alive	15.21	Recurred or Progressed	G2	Stage IV	T4	N0	M0	Negative
TCGA-CQ-A4CI	73	Male	31.21	Alive	16.98	Recurred or Progressed	G3	NA	TX	NX	MX	NA
TCGA-CN-6989	64	Male	32.19	Dead	29.2	Recurred or Progressed	G2	Stage IV	T3	N2	M0	Negative
TCGA-UF-A7JT	72	Female	32.62	Dead	23.59	Recurred or Progressed	G3	Stage IV	T4	N0	M0	NA
TCGA-CV-7422	60	Female	34.07	Dead	24.08	Recurred or Progressed	G3	Stage IV	T4	N1	M0	NA
TCGA-CQ-7068	80	Female	43	Alive	37.71	Recurred or Progressed	G2	Stage II	T2	N0	M0	NA
TCGA-CR-7404	53	Male	48.36	Alive	32.82	Recurred or Progressed	G2	Stage IV	T3	N2	M0	Positive
TCGA-CN-6010	53	Male	50.03	Alive	17.74	Recurred or Progressed	G2	Stage IV	T4	N0	M0	Negative
TCGA-CV-6953	80	Female	53.91	Dead	49.97	Recurred or Progressed	G1	Stage III	T3	N0	M0	NA
TCGA-CR-5248	53	Male	54.63	Alive	36.7	Recurred or Progressed	G3	Stage IV	T4	N2	M0	NA
TCGA-CV-A464	48	Male	56.57	Alive	0.92	Recurred or Progressed	G2	Stage IV	T4	N0	M0	NA
TCGA-BA-5153	51	Male	57.88	Dead	53.09	Recurred or Progressed	G2	Stage III	T2	N1	M0	NA
TCGA-BA-5559	71	Male	68.43	Dead	60.94	Recurred or Progressed	G3	Stage IV	T3	N2	M0	NA
TCGA-CV-A45Y	61	Male	88.8	Dead	76.15	Recurred or Progressed	G3	Stage IV	T4	N0	M0	NA
TCGA-CV-5434	60	Male	108.87	Dead	61.07	Recurred or Progressed	G2	Stage IV	T4	N1	M0	NA
TCGA-CV-7427	73	Female	156.37	Dead	107.82	Recurred or Progressed	G1	Stage II	T2	N0	M0	NA
TCGA-CX-7082	82	Male	0.36	Dead	NA	NA	G2	Stage II	T2	N0	M0	NA
TCGA-CV-7414	78	Male	0.46	Dead	NA	NA	G2	Stage III	T3	N1	M0	NA
TCGA-CV-A45V	87	Female	1.05	Dead	NA	NA	G1	Stage IV	T4	N0	M0	NA
TCGA-P3-A6T4	54	Male	2.04	Dead	NA	NA	G2	Stage IV	T4	N1	M0	NA
TCGA-CV-7255	32	Female	2.1	Dead	NA	NA	G2	Stage II	T2	N0	M0	NA
TCGA-CV-6961	61	Male	2.5	Dead	NA	NA	G3	Stage II	T2	N0	M0	NA
TCGA-CN-A642	57	Male	2.69	Dead	NA	NA	G3	Stage IV	T3	N2	M0	Negative
TCGA-UF-A71A	67	Male	2.83	Dead	NA	NA	G1	Stage IV	T3	N2	M0	NA
TCGA-BA-6871	75	Male	3.55	Dead	NA	NA	G2	Stage IV	T3	N2	M0	NA
TCGA-HD-A634	56	Male	4.27	Dead	NA	NA	G3	Stage III	T3	N1	M0	Positive
TCGA-CV-7236	77	Female	4.73	Dead	NA	NA	G3	Stage IV	T2	N2	M0	NA
TCGA-CV-7101	80	Male	5.26	Dead	NA	NA	G2	Stage II	T2	N0	M0	NA
TCGA-QK-A8Z8	60	Female	5.62	Dead	NA	NA	G2	Stage IV	T3	N1	M1	NA
TCGA-CV-A6JD	82	Female	5.98	Dead	NA	NA	G3	Stage IV	T4	N0	M0	NA
TCGA-CN-6020	58	Male	6.73	Dead	NA	NA	G2	Stage IV	T3	N2	M0	Negative
TCGA-CV-5978	53	Female	7.06	Dead	NA	NA	G2	Stage IV	T4	N3	M0	NA
TCGA-MZ-A5BI	53	Male	7.13	Dead	NA	NA	NA	Stage IV	T2	N2	M0	Positive
TCGA-CV-7434	64	Male	7.16	Dead	NA	NA	G2	Stage III	T3	N0	M0	NA
TCGA-CV-7100	66	Male	9	Dead	NA	NA	G3	Stage II	T2	N0	M0	NA
TCGA-CN-6021	63	Female	9.07	Dead	NA	NA	G2	Stage III	T3	N0	M0	NA
TCGA-CR-7377	58	Male	9.17	Dead	NA	NA	G3	Stage IV	T4	N1	M0	NA
TCGA-CV-6935	67	Male	9.69	Dead	NA	NA	G3	Stage III	T3	N0	M0	NA
TCGA-CV-7180	34	Male	10.74	Dead	NA	NA	G2	Stage II	T2	N0	M0	NA
TCGA-D6-6826	64	Female	11.43	Dead	NA	NA	G2	Stage IV	T4	N2	M0	NA
TCGA-F7-A622	75	Male	11.79	Dead	NA	NA	G1	NA	TX	NX	MX	NA
TCGA-QK-A8ZA	60	Male	12.19	Dead	NA	NA	G2	Stage IV	T2	N2	MX	Positive
TCGA-CN-A63W	48	Female	12.39	Dead	NA	NA	G2	Stage IV	T4	N2	M0	Negative
TCGA-CN-5369	90	Female	12.48	Dead	NA	NA	G3	Stage IV	T4	N1	M0	NA
TCGA-BA-6872	47	Male	12.61	Dead	NA	NA	G2	Stage IV	T3	N2	M0	NA
TCGA-CV-7097	53	Male	12.65	Dead	NA	NA	G3	Stage III	T3	N0	M0	NA
TCGA-CV-5970	59	Male	13.34	Dead	NA	NA	G2	Stage IV	T4	N2	M0	NA
TCGA-IQ-A61O	43	Male	13.83	Dead	NA	NA	GX	Stage IV	T2	N2	MX	NA
TCGA-CN-4738	53	Male	14.32	Dead	NA	NA	G2	Stage IV	T4	N0	M0	NA
TCGA-BA-6870	60	Female	14.82	Dead	NA	NA	G2	Stage IV	T3	N2	M1	NA
TCGA-CV-A468	42	Male	15.24	Dead	NA	NA	G2	Stage III	T3	N2	M0	NA
TCGA-P3-A6T7	55	Male	16	Dead	NA	NA	G2	Stage III	T3	N1	M0	NA
TCGA-CV-7430	56	Male	16.26	Dead	NA	NA	G2	Stage III	T3	N0	M0	NA
TCGA-CV-7248	63	Female	17.12	Dead	NA	NA	G2	Stage IV	T4	N2	M0	NA
TCGA-CV-5431	73	Male	17.15	Dead	NA	NA	G3	Stage IV	T3	N2	M0	NA
TCGA-CN-6018	85	Female	19.05	Dead	NA	NA	G2	Stage IV	T4	N2	M0	NA
TCGA-CV-5436	65	Male	19.19	Dead	NA	NA	G2	Stage IV	T3	N2	M0	NA
TCGA-CV-6937	71	Male	20.5	Dead	NA	NA	G2	Stage II	T2	N0	M0	NA
TCGA-CV-6939	60	Male	21.88	Dead	NA	NA	G3	Stage IV	T4	N1	M0	NA
TCGA-CV-7440	38	Male	22.17	Dead	NA	NA	GX	Stage II	T2	N0	M0	NA
TCGA-CV-7416	29	Female	25.07	Dead	NA	NA	GX	Stage IV	T4	N0	M0	NA
TCGA-CV-6940	80	Female	26.41	Dead	NA	NA	G2	Stage I	T1	N0	M0	NA
TCGA-CV-6960	49	Male	28.32	Dead	NA	NA	G3	Stage III	T3	N0	M0	NA
TCGA-DQ-5629	64	Male	30.91	Dead	NA	NA	G2	Stage IV	T4	N2	M0	Negative
TCGA-CQ-6220	69	Male	32.36	Dead	NA	NA	G2	Stage III	T2	N1	M0	NA
TCGA-CV-7407	67	Female	35.51	Dead	NA	NA	G2	Stage II	T2	N0	M0	NA
TCGA-CR-7369	59	Male	35.81	Dead	NA	NA	G2	Stage IV	T4	N0	M0	NA
TCGA-BA-4077	45	Female	37.25	Dead	NA	NA	G2	Stage IV	T4	N3	M0	NA
TCGA-P3-A6SX	67	Male	46.98	Dead	NA	NA	G2	Stage IV	T4	N0	M0	NA
TCGA-CV-A45Z	75	Male	48.16	Dead	NA	NA	G3	Stage II	T2	N0	M0	NA
TCGA-UF-A71E	63	Male	49.41	Dead	NA	NA	G3	Stage IV	T4	N0	M0	NA
TCGA-CV-7428	47	Male	54.89	Dead	NA	NA	G2	Stage IV	T4	N2	M0	NA
TCGA-CV-7406	49	Male	57.42	Dead	NA	NA	GX	Stage II	T2	N0	M0	NA
TCGA-CV-7089	74	Male	64.78	Dead	NA	NA	G2	Stage IV	T4	N2	M0	NA
TCGA-CV-7178	64	Female	71.16	Dead	NA	NA	G3	Stage IV	T4	N1	M0	NA
TCGA-CV-6933	53	Male	90.05	Dead	NA	NA	G2	Stage IV	T4	N0	M0	NA
TCGA-CV-7423	65	Male	100.49	Dead	NA	NA	G1	Stage II	T2	N0	M0	NA
TCGA-CV-7435	57	Female	153.75	Dead	NA	NA	G2	Stage IV	T4	N1	M0	NA
TCGA-CV-A45T	64	Female	159.53	Dead	NA	NA	G3	Stage II	T2	N0	M0	NA
TCGA-CV-A45Q	69	Female	169.25	Dead	NA	NA	G1	Stage IV	T4	N1	M0	NA
TCGA-CV-7410	61	Male	210.81	Dead	NA	NA	GX	Stage II	T2	N0	M0	NA
TCGA-HD-A4C1	41	Female	0.36	Alive	0.36	DiseaseFree	G1	Stage IV	T3	N2	M0	Negative
TCGA-F7-A61W	51	Male	0.46	Alive	0.46	DiseaseFree	G2	NA	TX	NX	MX	NA
TCGA-MT-A67D	55	Male	1.84	Alive	1.84	DiseaseFree	G2	Stage II	T2	N0	M0	NA
TCGA-D6-6824	61	Male	2.53	Alive	2.53	DiseaseFree	G2	Stage IV	T4	N1	M0	NA
TCGA-4P-AA8J	66	Male	3.35	Alive	3.35	DiseaseFree	G2	Stage IV	T4	N2	M0	Negative
TCGA-CR-7398	53	Female	5.12	Alive	5.12	DiseaseFree	G2	Stage II	T2	N0	M0	NA
TCGA-T2-A6X0	49	Male	7.1	Alive	7.1	DiseaseFree	G2	Stage IV	T1	N2	M0	NA
TCGA-CN-A63T	60	Male	7.39	Alive	7.39	DiseaseFree	G3	Stage IV	T3	N2	M0	Negative
TCGA-CR-6487	50	Male	7.69	Alive	7.69	DiseaseFree	G3	Stage II	T2	N0	M0	Positive
TCGA-MT-A51X	30	Male	7.95	Alive	7.95	DiseaseFree	G1	Stage IV	T1	N2	M0	NA
TCGA-QK-AA3K	60	Male	8.31	Alive	8.31	DiseaseFree	G2	Stage IV	T3	N2	MX	Positive
TCGA-CR-6481	47	Male	10.22	Alive	10.22	DiseaseFree	G2	Stage IV	T2	N2	M0	Positive
TCGA-CR-6482	62	Male	11.33	Alive	11.33	DiseaseFree	G3	Stage IV	T2	N2	M0	Positive
TCGA-CR-6484	67	Female	11.63	Alive	11.63	DiseaseFree	G2	Stage IV	T4	N0	M0	Negative
TCGA-MT-A67F	60	Female	12.61	Alive	12.61	DiseaseFree	G2	Stage IV	T4	N0	MX	NA
TCGA-C9-A480	45	Female	12.68	Alive	12.68	DiseaseFree	G1	Stage III	T3	N0	M0	NA
TCGA-QK-A6IJ	71	Male	12.71	Alive	12.71	DiseaseFree	G3	Stage II	T2	N0	M0	NA
TCGA-CN-4729	73	Male	12.88	Alive	12.88	DiseaseFree	G2	Stage IV	T4	N0	M0	NA
TCGA-QK-A8Z7	59	Male	12.88	Alive	12.88	DiseaseFree	NA	Stage IV	T4	N2	M0	NA
TCGA-BB-A6UM	52	Male	12.91	Alive	12.91	DiseaseFree	GX	Stage III	T2	N2	MX	Positive
TCGA-P3-A6T8	54	Male	13.14	Alive	13.14	DiseaseFree	G3	Stage IV	T4	N0	M0	NA
TCGA-TN-A7HJ	51	Male	13.24	Alive	13.24	DiseaseFree	G2	Stage III	T3	NX	M0	NA
TCGA-MT-A51W	52	Female	14.36	Alive	14.36	DiseaseFree	G2	Stage I	T1	NX	M0	Negative
TCGA-BA-A6DE	70	Female	14.45	Alive	14.45	DiseaseFree	G2	Stage III	T3	N0	M0	Negative
TCGA-WA-A7H4	69	Male	14.55	Alive	14.55	DiseaseFree	G3	Stage II	T2	N0	M0	NA
TCGA-H7-8501	54	Male	15.14	Alive	15.14	DiseaseFree	GX	Stage IV	T4	N2	M0	NA
TCGA-IQ-A6SH	55	Male	15.47	Alive	15.47	DiseaseFree	G1	Stage IV	T2	N1	M1	NA
TCGA-CR-6492	78	Male	15.74	Alive	15.74	DiseaseFree	G3	Stage IV	T4	N1	M0	Negative
TCGA-D6-6825	73	Male	16.13	Alive	16.13	DiseaseFree	G2	Stage III	T3	N0	M0	NA
TCGA-BA-A8YP	50	Male	16.39	Alive	16.39	DiseaseFree	G2	Stage IV	T4	N3	M0	Negative
TCGA-CR-6477	56	Female	16.89	Alive	16.89	DiseaseFree	G2	Stage IV	T3	N2	M0	Negative
TCGA-RS-A6TP	58	Male	16.95	Alive	16.95	DiseaseFree	G3	Stage II	T2	N0	M0	Positive
TCGA-QK-A8ZB	68	Male	17.81	Alive	17.81	DiseaseFree	G2	Stage IV	T4	N0	M0	NA
TCGA-F7-A620	47	Male	17.84	Alive	17.84	DiseaseFree	G1	NA	TX	NX	MX	NA
TCGA-BB-4228	50	Male	18.36	Alive	18.36	DiseaseFree	GX	Stage II	T2	N0	M0	Positive
TCGA-D6-6827	55	Female	18.66	Alive	18.66	DiseaseFree	G3	Stage III	T1	N1	M0	NA
TCGA-CX-7086	53	Male	18.82	Alive	18.82	DiseaseFree	G2	Stage IV	T4	N2	M0	NA
TCGA-F7-A50G	66	Male	20.24	Alive	20.24	DiseaseFree	G1	NA	NA	NA	NA	NA
TCGA-DQ-7591	62	Male	20.43	Alive	20.43	DiseaseFree	G4	Stage IV	T4	N2	M0	Positive
TCGA-BA-5557	41	Female	20.47	Alive	20.47	DiseaseFree	G2	Stage IV	T2	N2	M0	NA
TCGA-CN-A6V6	59	Male	20.86	Alive	20.86	DiseaseFree	GX	Stage IV	T2	N2	M0	Positive
TCGA-BA-6869	62	Male	21.16	Alive	21.16	DiseaseFree	G2	Stage III	T3	N0	M0	NA
TCGA-QK-A652	60	Male	21.19	Alive	21.19	DiseaseFree	G2	Stage II	T2	N0	M0	NA
TCGA-F7-8489	48	Male	21.62	Alive	21.62	DiseaseFree	G1	Stage II	T2	N0	M0	NA
TCGA-D6-A6EN	71	Male	22.57	Alive	22.57	DiseaseFree	G3	Stage III	T3	N0	M0	NA
TCGA-HD-8635	61	Female	22.83	Alive	22.83	DiseaseFree	G2	Stage III	T1	N1	M0	Negative
TCGA-CV-5971	60	Male	23.03	Alive	23.03	DiseaseFree	G2	Stage IV	T2	N2	M0	NA
TCGA-D6-6823	50	Male	23.03	Alive	23.03	DiseaseFree	G2	Stage III	T3	N1	M0	NA
TCGA-CN-A499	60	Female	23.55	Alive	23.55	DiseaseFree	G2	Stage I	T1	N0	M0	Positive
TCGA-CN-A6V3	61	Male	24.38	Alive	24.38	DiseaseFree	G3	Stage IV	T3	N2	M0	NA
TCGA-CR-7397	44	Male	24.77	Alive	24.77	DiseaseFree	G2	Stage IV	T3	N2	M0	NA
TCGA-D6-8568	62	Male	24.93	Alive	24.93	DiseaseFree	G2	Stage II	T2	N0	M0	NA
TCGA-F7-A61V	54	Male	24.93	Alive	24.93	DiseaseFree	G1	NA	TX	NX	MX	Negative
TCGA-BB-A5HU	47	Male	25.69	Alive	25.69	DiseaseFree	G2	Stage IV	T4	N2	M0	NA
TCGA-CV-7245	62	Male	26.18	Alive	26.18	DiseaseFree	G2	Stage III	T3	N0	M0	NA
TCGA-CR-5250	71	Male	26.25	Alive	26.25	DiseaseFree	G3	Stage II	T2	N0	M0	Positive
TCGA-HD-7832	52	Male	27.46	Alive	27.46	DiseaseFree	G2	Stage IV	T4	N2	M0	NA
TCGA-CR-7373	66	Male	29.2	Alive	29.2	DiseaseFree	G2	Stage IV	T4	N2	M0	Negative
TCGA-CQ-A4CB	59	Male	29.34	Alive	29.34	DiseaseFree	G2	Stage II	T2	N0	M0	NA
TCGA-UF-A7JH	59	Male	29.43	Alive	29.43	DiseaseFree	G1	Stage IV	T4	N0	M0	NA
TCGA-CQ-A4CE	76	Female	29.47	Alive	29.47	DiseaseFree	G2	Stage II	T2	N0	M0	NA
TCGA-P3-A5Q5	54	Male	29.89	Alive	29.89	DiseaseFree	G3	Stage IV	TX	N2	M0	NA
TCGA-CR-7391	36	Female	29.99	Alive	29.99	DiseaseFree	G1	Stage I	T1	N0	M0	Negative
TCGA-MT-A67A	85	Female	30.03	Alive	30.03	DiseaseFree	G2	Stage I	T1	N0	M0	NA
TCGA-CN-6011	57	Male	30.65	Alive	30.65	DiseaseFree	G3	Stage IV	T4	N0	M0	NA
TCGA-T2-A6X2	82	Male	32.42	Alive	32.42	DiseaseFree	G1	Stage III	T3	N0	M0	NA
TCGA-CR-7393	26	Male	32.62	Alive	32.62	DiseaseFree	G2	Stage I	T1	N0	M0	Negative
TCGA-F7-8298	58	Male	32.69	Alive	32.69	DiseaseFree	G1	Stage I	T1	N0	M0	NA
TCGA-CR-7385	42	Male	32.75	Alive	32.75	DiseaseFree	G2	Stage IV	T2	N2	M0	NA
TCGA-CR-6472	59	Male	34.49	Alive	34.49	DiseaseFree	G3	Stage IV	T2	N3	M0	NA
TCGA-HL-7533	65	Male	34.72	Alive	34.72	DiseaseFree	G3	Stage IV	T2	N2	M0	NA
TCGA-CV-A6JE	78	Male	35.32	Alive	35.32	DiseaseFree	G2	Stage II	T2	N0	M0	NA
TCGA-CR-7401	64	Male	35.38	Alive	35.38	DiseaseFree	G2	Stage I	T1	N0	M0	NA
TCGA-CV-7242	60	Female	35.97	Alive	35.97	DiseaseFree	G2	Stage III	T3	N0	M0	NA
TCGA-CR-6473	68	Male	36.96	Alive	36.96	DiseaseFree	G3	Stage IV	T3	N2	M0	NA
TCGA-IQ-A61E	55	Female	37.68	Alive	37.68	DiseaseFree	G2	Stage III	T3	N0	MX	NA
TCGA-CR-5249	35	Female	37.84	Alive	37.84	DiseaseFree	GX	Stage II	T2	N0	M0	NA
TCGA-CN-4725	60	Male	38.01	Alive	38.01	DiseaseFree	G2	Stage II	T2	N0	M0	Negative
TCGA-CN-6994	67	Male	38.86	Alive	38.86	DiseaseFree	G2	Stage IV	T4	N2	M0	NA
TCGA-CR-7365	60	Male	39.13	Alive	39.13	DiseaseFree	G2	Stage IV	T4	N2	M0	NA
TCGA-CR-7368	54	Male	40.9	Alive	40.9	DiseaseFree	G2	Stage IV	T4	N0	M0	NA
TCGA-CQ-6218	52	Female	41.16	Alive	41.16	DiseaseFree	G2	Stage III	T3	N0	M0	NA
TCGA-BA-5152	56	Male	42.31	Alive	42.31	DiseaseFree	G2	Stage IV	T4	N0	M0	NA
TCGA-CQ-7071	76	Female	43.07	Alive	43.07	DiseaseFree	G2	Stage IV	T4	N1	M0	NA
TCGA-CR-7394	70	Male	44.22	Alive	44.22	DiseaseFree	G2	Stage IV	T3	N2	M0	Negative
TCGA-CN-5356	56	Male	46.29	Alive	46.29	DiseaseFree	G2	Stage III	T3	N0	M0	NA
TCGA-CR-7392	67	Female	46.81	Alive	46.81	DiseaseFree	G1	Stage IV	T3	N2	M0	Negative
TCGA-CQ-6223	69	Male	46.91	Alive	46.91	DiseaseFree	G2	Stage IV	T4	N0	M0	NA
TCGA-CR-7367	52	Male	47.31	Alive	47.31	DiseaseFree	G1	Stage IV	T4	N3	M0	NA
TCGA-UF-A71D	54	Female	48	Alive	48	DiseaseFree	G2	Stage IV	T4	N1	M0	NA
TCGA-CQ-5323	82	Male	48.16	Alive	48.16	DiseaseFree	G2	Stage III	T3	N0	M0	NA
TCGA-CR-7390	67	Male	49.54	Alive	49.54	DiseaseFree	G2	Stage III	T3	N0	M0	Negative
TCGA-CR-6470	38	Male	49.97	Alive	49.97	DiseaseFree	G2	Stage IV	T1	N2	M0	NA
TCGA-P3-A5QE	49	Male	51.22	Alive	51.22	DiseaseFree	G2	Stage III	T1	N1	M0	NA
TCGA-CN-6023	73	Male	52.04	Alive	52.04	DiseaseFree	GX	Stage IV	T4	N0	M0	Negative
TCGA-UF-A7JF	80	Male	55.39	Alive	55.39	DiseaseFree	G2	Stage IV	T4	N2	M0	NA
TCGA-CQ-6224	52	Male	56.54	Alive	56.54	DiseaseFree	G3	Stage II	T2	N0	M0	NA
TCGA-CN-4728	56	Male	56.64	Alive	56.64	DiseaseFree	G2	Stage IV	T2	N2	M0	Negative
TCGA-CV-5977	66	Male	60.45	Alive	60.45	DiseaseFree	G2	Stage III	T3	N1	M0	NA
TCGA-CQ-5329	46	Female	70.4	Alive	70.4	DiseaseFree	G2	Stage III	T3	N1	M0	NA
TCGA-BB-8596	69	Female	70.99	Alive	70.99	DiseaseFree	G3	Stage IV	T4	N1	M0	NA
TCGA-UF-A7JA	66	Female	74.41	Alive	74.41	DiseaseFree	G2	Stage IV	T4	N1	M0	NA
TCGA-P3-A6T2	45	Male	75.49	Alive	75.49	DiseaseFree	G2	Stage II	T2	N0	M0	NA
TCGA-CV-5442	76	Female	76.45	Alive	76.45	DiseaseFree	G3	Stage IV	T4	N2	M0	NA
TCGA-CV-7235	67	Male	77.1	Alive	77.1	DiseaseFree	G3	Stage III	T3	N0	M0	NA
TCGA-CV-5444	64	Male	80.06	Alive	80.06	DiseaseFree	G3	Stage IV	T4	N0	M0	NA
TCGA-CV-5443	63	Male	91.46	Alive	91.46	DiseaseFree	G3	Stage III	T3	N1	M0	NA
TCGA-CV-5441	58	Male	94.81	Alive	94.81	DiseaseFree	G3	Stage IV	T4	N1	M0	NA
TCGA-BB-4223	48	Male	105.81	Alive	105.81	DiseaseFree	G3	Stage IV	T3	N2	M0	NA
TCGA-CV-5440	52	Male	107.42	Alive	107.42	DiseaseFree	G3	Stage IV	T4	N2	M0	NA
TCGA-CV-5432	68	Male	129.11	Alive	129.11	DiseaseFree	G3	Stage III	T3	N0	M0	NA
TCGA-CV-7090	39	Male	172.54	Alive	172.54	DiseaseFree	G2	Stage II	T2	N0	M0	NA
TCGA-CV-A45R	46	Male	180.03	Alive	180.03	DiseaseFree	G1	Stage III	T3	N1	M0	NA
