# Supplementary material for: Identification of prognostic aging-related genes associated with immunosuppression and inflammation in head and neck squamous cell carcinoma
Source: Aging (Albany NY). 2020 Nov 24;12(24):25778–804. doi: 10.18632/aging.104199 (PMC7803584; doi:10.18632/aging.104199)
Supplement: Supplementary Table 4 [file aging-12-104199-s005.xlsx]

## Sheet: Table S4
Supplementary Table 4. Information for the TCGA test set.
Information for the TCGA test set.
ID	Age	Sex	OSyears	OSstatus	DSFyears	DSFstatus	Grade	Stage	T	N	M	HPV
TCGA-CV-7421	76	Male	0.07	Dead	NA	NA	G2	Stage IV	T4	N0	M0	NA
TCGA-IQ-A61I	63	Male	0.07	Dead	NA	NA	G3	Stage IV	T1	N2	M0	NA
TCGA-CV-A463	82	Female	0.76	Dead	NA	NA	G2	Stage IV	T4	N0	M0	NA
TCGA-CR-7374	67	Female	0.99	Alive	0.99	DiseaseFree	G2	Stage II	T2	N0	M0	NA
TCGA-CV-7102	76	Female	1.84	Dead	NA	NA	G3	Stage III	T3	N1	M0	NA
TCGA-CV-6934	66	Female	2.14	Dead	NA	NA	G2	Stage IV	T3	N2	M0	NA
TCGA-BA-A6DG	49	Male	2.27	Dead	NA	NA	G2	Stage IV	T4	N2	M0	Negative
TCGA-CQ-5326	67	Male	2.92	Dead	NA	NA	G3	Stage IV	T4	N2	M0	NA
TCGA-F7-A50I	72	Male	3.02	Alive	3.02	DiseaseFree	G2	NA	NA	NA	NA	NA
TCGA-CR-7371	45	Female	3.09	Dead	NA	NA	G2	Stage III	T3	N0	M0	NA
TCGA-CR-7370	72	Female	3.45	Alive	3.45	DiseaseFree	G2	Stage II	T2	N0	M0	NA
TCGA-CV-7429	55	Male	3.52	Dead	NA	NA	G3	Stage III	T3	N0	M0	NA
TCGA-CV-A6JU	61	Female	3.61	Alive	3.61	DiseaseFree	G2	Stage IV	T4	N0	M0	NA
TCGA-HD-A6HZ	79	Female	3.65	Alive	3.65	DiseaseFree	G2	Stage II	T2	N0	M0	NA
TCGA-CN-6995	78	Male	3.68	Dead	NA	NA	G2	Stage IV	T4	N1	M0	NA
TCGA-BA-6873	28	Male	4.01	Alive	2.17	Recurred or Progressed	G2	Stage IV	T2	N2	M0	NA
TCGA-CV-6962	65	Male	4.14	Dead	NA	NA	G2	Stage III	T3	N0	M0	NA
TCGA-CQ-6227	77	Male	4.24	Dead	NA	NA	G2	Stage III	T3	N1	M0	NA
TCGA-CN-4726	68	Male	4.66	Dead	2.6	Recurred or Progressed	G2	Stage IV	T3	N2	M0	Negative
TCGA-CV-6938	87	Male	4.73	Dead	NA	NA	G1	Stage II	T2	N0	M0	NA
TCGA-BB-4225	73	Male	4.8	Alive	4.8	DiseaseFree	G3	Stage IV	T3	N2	M0	NA
TCGA-CV-7252	62	Female	4.96	Dead	NA	NA	G2	Stage III	T3	N0	M0	NA
TCGA-CR-7399	60	Female	5.95	Alive	5.95	DiseaseFree	G3	Stage IV	T4	N2	M0	NA
TCGA-CR-6478	66	Female	6.01	Dead	NA	NA	G3	Stage IV	T3	N2	M0	NA
TCGA-CV-6952	65	Female	6.08	Dead	NA	NA	G1	Stage III	T3	N0	M0	NA
TCGA-BB-4217	68	Male	6.14	Alive	6.14	DiseaseFree	G3	Stage IV	T4	N2	M0	NA
TCGA-C9-A47Z	72	Female	6.27	Dead	NA	NA	G1	Stage III	T2	N1	M0	NA
TCGA-CV-7438	87	Female	6.37	Dead	NA	NA	G3	Stage II	T2	N0	M0	NA
TCGA-CV-A6JM	85	Male	6.37	Dead	3.52	Recurred or Progressed	G2	Stage IV	T4	N0	M0	NA
TCGA-CV-A6JO	69	Male	6.47	Dead	4.17	Recurred or Progressed	G2	Stage IV	T4	N2	M0	NA
TCGA-CV-A45X	47	Male	6.5	Dead	NA	NA	G2	Stage IV	T4	N1	M0	NA
TCGA-T2-A6WX	73	Female	6.87	Dead	NA	NA	G1	Stage III	T3	N0	M0	NA
TCGA-HD-A6I0	56	Male	6.9	Alive	6.9	DiseaseFree	G1	Stage III	T3	NX	M0	NA
TCGA-CV-A465	24	Male	7.06	Dead	NA	NA	G1	Stage II	T2	N0	M0	NA
TCGA-CV-6956	67	Male	7.13	Dead	NA	NA	G2	Stage IV	T4	N2	M0	NA
TCGA-QK-A6IG	69	Male	7.29	Dead	5.55	Recurred or Progressed	G2	Stage II	T2	N0	M0	NA
TCGA-D6-A6EM	65	Female	7.62	Alive	7.62	Recurred or Progressed	G2	Stage III	T2	N1	M0	NA
TCGA-CV-7099	85	Female	7.98	Dead	NA	NA	G2	Stage II	T2	N0	M0	NA
TCGA-CV-6959	48	Male	8.41	Dead	3.38	Recurred or Progressed	G2	Stage III	T3	N1	M0	NA
TCGA-CN-5370	78	Male	8.51	Dead	4.04	Recurred or Progressed	G3	Stage II	T2	N0	M0	Negative
TCGA-CN-5358	60	Male	8.57	Dead	4.76	Recurred or Progressed	G2	Stage III	T2	N1	M0	Negative
TCGA-BA-4078	83	Male	9.07	Dead	NA	NA	G2	Stage IV	T2	N2	M0	NA
TCGA-CN-6022	49	Male	9.23	Dead	3.32	Recurred or Progressed	G3	Stage IV	T4	N1	M0	Negative
TCGA-CV-7413	74	Female	9.66	Dead	NA	NA	G2	Stage II	T2	N0	M0	NA
TCGA-CQ-5332	87	Male	10.41	Dead	NA	NA	G2	Stage III	T3	N0	M0	NA
TCGA-CV-A6K2	79	Male	10.41	Dead	4.4	Recurred or Progressed	G1	Stage II	T2	N0	M0	NA
TCGA-CN-6988	47	Male	10.45	Alive	10.45	DiseaseFree	G3	Stage IV	T4	N2	M0	Negative
TCGA-CX-7085	77	Female	10.55	Alive	10.12	Recurred or Progressed	G2	Stage III	T3	N0	M0	NA
TCGA-KU-A6H8	41	Male	10.74	Dead	3.61	Recurred or Progressed	G3	Stage I	T1	N0	M0	NA
TCGA-P3-A5QF	49	Male	10.84	Dead	4.6	Recurred or Progressed	G2	Stage IV	T4	N2	M0	NA
TCGA-CV-6955	74	Female	10.97	Dead	NA	NA	G3	Stage II	T2	N0	M0	NA
TCGA-CN-6024	66	Male	11.07	Dead	5.12	Recurred or Progressed	G2	Stage IV	T4	N2	M0	Negative
TCGA-CV-6941	51	Male	11.24	Dead	NA	NA	G2	Stage III	T3	N0	M0	NA
TCGA-BA-A6DA	41	Female	11.53	Alive	11.53	DiseaseFree	G2	Stage IV	T4	N2	M0	Positive
TCGA-CN-5365	38	Male	11.53	Dead	NA	NA	G2	Stage IV	T1	N2	M1	NA
TCGA-CN-5367	60	Female	11.56	Dead	NA	NA	G2	Stage IV	T4	N0	M0	NA
TCGA-CQ-A4C7	88	Male	11.6	Dead	6.8	Recurred or Progressed	G3	Stage II	T2	N0	M0	NA
TCGA-CR-5247	48	Male	11.76	Alive	11.76	DiseaseFree	G2	Stage III	T3	N1	M0	NA
TCGA-IQ-A61G	57	Male	11.83	Alive	8.18	Recurred or Progressed	G2	Stage IV	T4	N2	MX	NA
TCGA-CV-7253	58	Male	11.86	Dead	NA	NA	G2	Stage II	T2	N0	M0	NA
TCGA-CR-6480	53	Male	11.89	Alive	11.89	DiseaseFree	G2	Stage IV	T2	N2	M0	Positive
TCGA-CV-6945	41	Male	12.02	Dead	NA	NA	G2	Stage IV	T4	N2	M0	NA
TCGA-CN-A641	47	Male	12.06	Alive	12.06	DiseaseFree	G2	Stage IV	T4	N2	M0	Positive
TCGA-D6-A6EQ	57	Male	12.09	Alive	12.09	DiseaseFree	G3	Stage IV	T4	N1	M0	NA
TCGA-D6-A4ZB	61	Male	12.35	Alive	12.35	DiseaseFree	G2	Stage III	T3	N0	M0	NA
TCGA-F7-A624	73	Male	12.42	Alive	12.42	DiseaseFree	G3	NA	TX	NX	MX	NA
TCGA-CR-6488	68	Female	12.45	Alive	12.45	DiseaseFree	G2	Stage II	T2	N0	M0	NA
TCGA-CQ-A4CH	58	Male	12.45	Dead	11.63	Recurred or Progressed	G2	Stage IV	T4	N2	M0	NA
TCGA-HD-8634	51	Female	12.65	Dead	NA	NA	G2	Stage I	T1	NX	M0	NA
TCGA-RS-A6TO	82	Female	12.71	Dead	11.1	Recurred or Progressed	G2	Stage IV	T4	N2	M0	Negative
TCGA-D6-A6ES	50	Male	12.78	Alive	12.78	DiseaseFree	G2	Stage IV	T4	N1	M0	NA
TCGA-CR-7389	55	Male	12.88	Alive	12.88	DiseaseFree	G2	Stage III	T2	N1	M0	NA
TCGA-CV-7104	61	Female	12.91	Dead	NA	NA	G2	Stage IV	T2	N2	M0	NA
TCGA-CN-4742	48	Female	13.04	Dead	NA	NA	G3	Stage IV	T4	N1	M0	Negative
TCGA-KU-A66S	69	Female	13.34	Dead	12.78	Recurred or Progressed	G2	Stage III	T2	N1	MX	NA
TCGA-TN-A7HI	56	Male	13.53	Alive	13.53	DiseaseFree	G3	Stage I	T1	N0	M0	Positive
TCGA-BA-4076	39	Male	13.63	Dead	9.4	Recurred or Progressed	G2	Stage IV	T3	N2	M0	NA
TCGA-T3-A92M	52	Male	13.7	Alive	13.7	Recurred or Progressed	G2	Stage IV	T4	N2	M0	NA
TCGA-HD-A633	74	Male	13.83	Alive	13.76	Recurred or Progressed	G2	Stage IV	T4	N0	M0	NA
TCGA-D6-A6EP	62	Male	13.93	Alive	13.93	DiseaseFree	G3	Stage III	T3	N0	M0	NA
TCGA-IQ-7632	68	Female	14.49	Alive	14.49	DiseaseFree	G1	Stage IV	T4	N0	M0	NA
TCGA-HD-8224	63	Male	14.65	Dead	5.62	Recurred or Progressed	G3	Stage III	T3	N0	M0	Negative
TCGA-CV-7424	67	Male	14.88	Dead	NA	NA	G2	Stage IV	T4	N2	M0	NA
TCGA-CQ-6228	71	Female	14.98	Dead	8.97	Recurred or Progressed	G2	Stage III	T2	N1	M0	NA
TCGA-H7-8502	50	Male	15.05	Alive	15.05	DiseaseFree	G2	Stage IV	T4	N2	M0	NA
TCGA-BA-4074	69	Male	15.18	Dead	13.01	Recurred or Progressed	G3	Stage IV	T3	N2	M0	NA
TCGA-QK-AA3J	69	Male	15.31	Alive	15.31	DiseaseFree	G3	Stage I	T1	N0	M0	NA
TCGA-CQ-6219	50	Female	15.74	Dead	6.41	Recurred or Progressed	G2	Stage IV	T3	N2	M0	NA
TCGA-T2-A6WZ	53	Male	15.9	Dead	7.52	Recurred or Progressed	G2	Stage IV	T3	N2	M0	NA
TCGA-IQ-7630	49	Male	15.93	Alive	15.93	DiseaseFree	G3	Stage III	T3	N0	M0	NA
TCGA-MZ-A6I9	68	Male	16.06	Dead	15.87	Recurred or Progressed	G2	Stage IV	T4	N2	M0	Positive
TCGA-CN-5364	55	Male	16.2	Dead	NA	NA	G2	Stage IV	T4	N2	M0	NA
TCGA-CV-7437	77	Male	16.62	Dead	NA	NA	GX	Stage II	T2	N0	M0	NA
TCGA-UP-A6WW	58	Male	17.02	Alive	17.02	DiseaseFree	G2	Stage IV	T2	N2	MX	NA
TCGA-CR-7383	79	Female	17.12	Dead	14.91	Recurred or Progressed	G2	Stage I	T1	N0	M0	NA
TCGA-CN-6996	58	Female	17.41	Dead	14.68	Recurred or Progressed	G2	Stage IV	T3	N2	M0	NA
TCGA-D6-A4Z9	59	Male	17.71	Alive	17.71	DiseaseFree	G2	Stage IV	T2	N2	M0	NA
TCGA-CV-5966	63	Female	17.9	Dead	NA	NA	G3	Stage IV	T4	N1	M0	NA
TCGA-CV-5439	62	Male	17.94	Dead	6.93	Recurred or Progressed	G2	Stage II	T2	N0	M0	NA
TCGA-DQ-5631	52	Male	18	Dead	14.68	Recurred or Progressed	G3	Stage IV	T3	N2	M0	NA
TCGA-UF-A7JJ	68	Male	18.04	Alive	18.04	DiseaseFree	G1	Stage IV	T4	N0	M0	NA
TCGA-KU-A66T	53	Female	18.13	Alive	18.13	Recurred or Progressed	G2	Stage IV	T4	N0	M0	NA
TCGA-CV-7263	64	Male	18.4	Dead	NA	NA	G1	Stage II	T2	NX	M0	NA
TCGA-CR-6474	51	Male	18.53	Dead	7.23	Recurred or Progressed	G2	Stage IV	T3	N2	M0	NA
TCGA-CV-7095	87	Female	18.79	Dead	NA	NA	G2	Stage IV	T1	N2	M0	NA
TCGA-CV-7247	55	Male	18.96	Dead	NA	NA	G2	Stage II	T2	N0	M0	NA
TCGA-P3-A6T3	49	Male	18.96	Dead	7.95	Recurred or Progressed	G2	Stage IV	T4	N1	M0	NA
TCGA-IQ-A6SG	61	Female	19.02	Alive	19.02	DiseaseFree	G2	Stage III	T3	N0	M0	NA
TCGA-KU-A6H7	55	Female	19.25	Alive	19.25	DiseaseFree	G2	Stage IV	T2	N2	M0	Positive
TCGA-CN-A6V7	40	Male	19.51	Alive	19.51	DiseaseFree	GX	Stage IV	T2	N2	M0	Positive
TCGA-QK-A6VC	62	Female	19.71	Alive	19.71	DiseaseFree	G2	Stage IV	T4	N2	M0	NA
TCGA-CV-6943	74	Male	19.78	Dead	NA	NA	G2	Stage III	T3	N0	M0	NA
TCGA-CR-7380	58	Male	19.91	Dead	18.43	Recurred or Progressed	G2	Stage III	T3	N0	M0	NA
TCGA-F7-A623	70	Male	20.24	Alive	20.24	DiseaseFree	G1	NA	TX	NX	MX	NA
TCGA-TN-A7HL	59	Male	20.34	Alive	20.34	DiseaseFree	G2	Stage IV	T4	NX	M0	Positive
TCGA-BA-A4IH	57	Male	20.43	Alive	20.43	DiseaseFree	G3	Stage IV	T2	N2	M0	Positive
TCGA-BA-A6DL	59	Male	20.47	Alive	20.47	DiseaseFree	G2	Stage III	T3	N0	M0	Negative
TCGA-CN-4737	19	Male	20.53	Alive	20.53	DiseaseFree	G2	Stage II	T2	N0	M0	Negative
TCGA-WA-A7GZ	58	Male	20.53	Dead	NA	NA	G2	Stage II	T2	N0	M0	NA
TCGA-UF-A7JO	79	Female	20.73	Dead	17.25	Recurred or Progressed	G2	Stage IV	T4	N0	M0	NA
TCGA-H7-A76A	57	Male	20.93	Alive	20.93	DiseaseFree	G2	Stage IV	T2	N2	M0	Positive
TCGA-QK-A64Z	79	Female	21.06	Dead	18.17	Recurred or Progressed	G1	Stage II	T2	N0	M0	NA
TCGA-CV-6433	57	Male	21.06	Alive	21.06	DiseaseFree	G3	Stage II	T2	N0	M0	NA
TCGA-CN-A49C	67	Male	21.19	Alive	21.19	DiseaseFree	GX	Stage IV	T4	N2	M0	Positive
TCGA-CV-A6JY	69	Male	21.22	Alive	21.22	DiseaseFree	G1	Stage IV	T4	N0	M0	NA
TCGA-CQ-5325	65	Male	21.48	Dead	19.35	Recurred or Progressed	G2	Stage I	T1	N0	M0	NA
TCGA-CV-7177	82	Female	21.78	Dead	NA	NA	G2	Stage I	T1	N0	M0	NA
TCGA-HD-7831	74	Male	21.91	Alive	21.91	Recurred or Progressed	G2	Stage III	T3	N0	M0	NA
TCGA-HD-8314	58	Male	22.01	Alive	22.01	DiseaseFree	G4	Stage III	T1	N1	M0	Positive
TCGA-CN-A63V	59	Male	22.31	Alive	22.31	DiseaseFree	G2	Stage IV	T4	N0	M0	Negative
TCGA-UF-A7JS	59	Male	22.34	Dead	17.05	Recurred or Progressed	G2	Stage IV	T3	N2	M0	NA
TCGA-CV-A6K1	65	Male	22.5	Alive	13.17	Recurred or Progressed	G2	Stage IV	T4	N0	M0	NA
TCGA-CR-6491	60	Male	22.77	Alive	16.39	Recurred or Progressed	G2	Stage IV	T4	NX	M0	Negative
TCGA-CV-7415	60	Male	22.83	Dead	NA	NA	G2	Stage III	T3	N0	M0	NA
TCGA-QK-A6IF	61	Male	23.13	Alive	16.49	Recurred or Progressed	GX	Stage IV	T1	N2	M0	Positive
TCGA-D6-A74Q	67	Male	23.32	Alive	23.32	DiseaseFree	G3	Stage IV	T4	N0	M0	NA
TCGA-CN-A6UY	57	Male	23.42	Alive	23.42	DiseaseFree	G2	Stage IV	T3	N2	M0	Positive
TCGA-BA-5556	58	Female	23.82	Alive	23.82	DiseaseFree	G3	Stage II	T2	N0	M0	NA
TCGA-UF-A7JD	71	Male	24.28	Dead	NA	NA	G3	Stage IV	T4	N0	M0	NA
TCGA-CR-7372	45	Male	24.93	Alive	24.93	DiseaseFree	G1	Stage II	T2	N0	M0	Negative
TCGA-D6-A6EO	44	Male	24.93	Alive	24.93	DiseaseFree	G2	Stage IV	T4	N0	M0	NA
TCGA-D6-8569	52	Male	25.3	Alive	25.3	DiseaseFree	G2	Stage II	T2	N0	M0	NA
TCGA-D6-6516	69	Male	25.39	Alive	25.39	DiseaseFree	G2	Stage III	T1	N1	M0	NA
TCGA-HD-7754	69	Male	25.72	Alive	25.72	DiseaseFree	G1	Stage IV	T2	N2	M0	NA
TCGA-CN-4730	62	Male	26.84	Alive	26.84	DiseaseFree	G2	Stage IV	T4	N2	M0	NA
TCGA-CR-7388	70	Female	27.04	Dead	20.04	Recurred or Progressed	G2	Stage IV	T2	N2	M0	NA
TCGA-BB-A5HZ	65	Male	27.17	Alive	14.39	Recurred or Progressed	G2	Stage IV	T4	N1	M0	NA
TCGA-QK-A6V9	56	Male	27.37	Alive	27.37	DiseaseFree	G2	Stage II	T2	N0	M0	Positive
TCGA-CN-4740	79	Female	27.56	Dead	23.65	Recurred or Progressed	G2	Stage IV	T4	N0	M0	NA
TCGA-CV-A45O	57	Male	27.96	Alive	27.96	DiseaseFree	G2	Stage III	T3	N0	M0	NA
TCGA-CV-A6JT	65	Male	27.99	Alive	27.99	DiseaseFree	G2	Stage II	T2	N0	M0	NA
TCGA-CN-6017	55	Male	28.02	Dead	NA	NA	G2	Stage III	T2	N1	M0	Negative
TCGA-BA-A4IG	77	Male	28.09	Alive	28.09	DiseaseFree	G3	Stage IV	T2	N2	M0	NA
TCGA-HD-7753	62	Male	28.45	Alive	28.45	DiseaseFree	G2	Stage II	T2	N0	M0	NA
TCGA-D6-A6EK	67	Male	28.75	Alive	28.75	DiseaseFree	G1	Stage IV	T4	N1	M0	NA
TCGA-P3-A6T5	79	Female	28.98	Dead	18.96	Recurred or Progressed	G2	Stage IV	T4	N0	M0	NA
TCGA-CN-A49B	71	Male	29.7	Alive	29.7	DiseaseFree	G3	Stage III	T3	N1	M0	Negative
TCGA-CV-A6JN	53	Male	29.76	Alive	29.76	DiseaseFree	G1	Stage II	T2	N0	M0	NA
TCGA-CR-7402	68	Male	29.93	Alive	29.93	DiseaseFree	G2	Stage III	T3	N0	M0	NA
TCGA-CV-6951	57	Male	30.06	Dead	NA	NA	G2	Stage IV	T4	N2	M0	NA
TCGA-BA-A4II	46	Male	30.16	Alive	30.16	Recurred or Progressed	G1	Stage I	T1	N0	M0	NA
TCGA-CV-7568	48	Female	30.45	Dead	NA	NA	GX	Stage IV	T4	N0	M0	NA
TCGA-CR-7395	80	Female	30.55	Alive	30.55	DiseaseFree	G2	Stage II	T2	N0	M0	Negative
TCGA-F7-A50J	67	Female	31.11	Alive	31.11	DiseaseFree	G2	NA	NA	NA	NA	NA
TCGA-CN-A63U	50	Male	31.67	Alive	31.67	DiseaseFree	G3	Stage III	T3	N0	M0	Negative
TCGA-CR-7376	83	Male	31.93	Alive	31.93	DiseaseFree	G2	Stage II	T2	N0	M0	Negative
TCGA-CN-6997	66	Male	32.46	Dead	9.17	Recurred or Progressed	G3	Stage IV	T4	N2	M0	Negative
TCGA-CN-4731	63	Female	32.79	Dead	28.78	Recurred or Progressed	G3	Stage IV	T4	N2	M0	Negative
TCGA-CQ-6221	79	Male	32.85	Alive	32.85	DiseaseFree	G3	Stage II	T2	N0	M0	NA
TCGA-IQ-A61J	54	Male	33.54	Alive	33.54	DiseaseFree	G1	Stage IV	T2	N2	M0	NA
TCGA-CQ-A4CD	69	Male	33.57	Alive	33.57	DiseaseFree	G3	Stage IV	T4	N0	M0	NA
TCGA-HD-7229	60	Male	33.74	Alive	5.32	Recurred or Progressed	G3	Stage IV	T4	NX	M0	NA
TCGA-DQ-5630	73	Male	33.84	Alive	33.84	DiseaseFree	G2	Stage III	T3	N1	M0	NA
TCGA-CR-7379	78	Female	34.03	Alive	34.03	DiseaseFree	G2	Stage IV	T4	N2	M0	Negative
TCGA-CN-6019	61	Male	34.1	Alive	34.1	DiseaseFree	G2	Stage IV	T4	N0	M0	Negative
TCGA-CX-7219	47	Male	34.33	Alive	34.33	DiseaseFree	G2	Stage IV	T4	N2	M0	NA
TCGA-CN-A497	63	Male	34.99	Alive	34.99	DiseaseFree	G2	Stage IV	T2	N2	M0	Negative
TCGA-CN-6992	61	Male	35.02	Alive	35.02	DiseaseFree	G2	Stage IV	T4	N1	M0	Negative
TCGA-CV-A45U	59	Male	35.45	Dead	34.95	Recurred or Progressed	G1	Stage IV	T4	N0	M0	NA
TCGA-CV-7446	66	Male	35.91	Dead	NA	NA	G2	Stage II	T2	N0	M0	NA
TCGA-P3-A6SW	50	Male	36.79	Alive	36.79	DiseaseFree	G3	Stage IV	T4	N2	M0	NA
TCGA-F7-7848	47	Male	37.16	Alive	37.16	DiseaseFree	G2	Stage IV	T4	N1	M0	NA
TCGA-DQ-5625	52	Female	37.22	Dead	34.76	Recurred or Progressed	G2	Stage II	T2	N0	M0	NA
TCGA-IQ-A61H	76	Male	37.39	Alive	37.39	DiseaseFree	G2	Stage II	T2	N0	MX	NA
TCGA-DQ-7592	57	Male	37.55	Alive	37.55	DiseaseFree	G2	Stage IV	T4	N2	M0	Negative
TCGA-IQ-7631	60	Female	38.5	Alive	38.5	DiseaseFree	G1	Stage II	T2	N0	M0	NA
TCGA-CQ-6229	61	Male	38.73	Alive	38.73	DiseaseFree	G2	Stage III	T2	N1	M0	NA
TCGA-CR-6471	58	Male	39.49	Dead	33.41	Recurred or Progressed	G2	Stage IV	T4	N0	M0	NA
TCGA-BA-7269	61	Male	41.82	Alive	41.82	DiseaseFree	G1	Stage III	T2	N1	M0	NA
TCGA-CQ-7069	77	Female	41.85	Alive	41.85	DiseaseFree	G2	Stage II	T2	N0	M0	NA
TCGA-CN-5355	64	Male	41.98	Alive	41.98	DiseaseFree	G2	Stage IV	T4	N0	M0	NA
TCGA-CV-6948	79	Female	42.35	Dead	NA	NA	G2	Stage IV	T4	N0	M0	NA
TCGA-CV-5979	26	Male	43.2	Alive	43.2	DiseaseFree	G2	Stage III	T3	N1	M0	NA
TCGA-CQ-A4C6	63	Male	44.45	Alive	44.45	DiseaseFree	G2	Stage II	T2	N0	M0	NA
TCGA-UF-A7J9	75	Male	44.61	Alive	44.61	DiseaseFree	G2	Stage IV	T4	N0	M0	NA
TCGA-CN-4739	71	Male	45.8	Dead	42.77	Recurred or Progressed	G2	Stage IV	T4	N0	M0	NA
TCGA-CV-A45W	75	Male	45.93	Dead	NA	NA	G2	Stage III	T3	N0	M0	NA
TCGA-CQ-5331	73	Female	45.96	Alive	45.96	DiseaseFree	G2	Stage IV	T4	N0	M0	NA
TCGA-CR-7386	69	Male	46.98	Alive	33.77	Recurred or Progressed	G1	Stage IV	T4	N1	M0	NA
TCGA-CR-7364	66	Male	47.14	Alive	47.14	DiseaseFree	G2	Stage III	T3	N0	M0	NA
TCGA-CN-6016	64	Male	47.4	Alive	47.4	DiseaseFree	G2	Stage IV	T4	N1	M0	Negative
TCGA-CV-7254	55	Male	47.93	Dead	NA	NA	G3	Stage II	T2	N0	M0	NA
TCGA-CN-6012	66	Male	47.96	Alive	47.96	DiseaseFree	G2	Stage III	T3	N1	M0	Negative
TCGA-CV-5976	50	Male	48.55	Alive	48.55	DiseaseFree	G2	Stage III	T3	N1	M0	NA
TCGA-CN-4722	61	Female	48.72	Alive	48.72	DiseaseFree	G1	Stage II	T2	N0	M0	NA
TCGA-UF-A71B	50	Male	49.47	Alive	49.47	DiseaseFree	G2	Stage IV	T4	N1	M0	NA
TCGA-CV-7261	57	Male	49.67	Alive	49.67	DiseaseFree	G2	Stage III	T3	N0	M0	NA
TCGA-CX-A4AQ	56	Male	51.08	Alive	51.08	DiseaseFree	G3	Stage IV	T1	N2	M0	NA
TCGA-CN-4727	56	Male	51.25	Alive	51.25	DiseaseFree	G2	Stage IV	T4	N0	M0	Negative
TCGA-CN-5373	55	Female	52.04	Alive	52.04	DiseaseFree	G1	Stage II	T2	N0	M0	Negative
TCGA-CN-4733	61	Male	52.1	Alive	52.1	DiseaseFree	G3	Stage I	T1	N0	M0	Negative
TCGA-CV-7103	49	Male	52.27	Dead	NA	NA	G2	Stage II	T2	N0	M0	NA
TCGA-CQ-5324	59	Male	52.33	Alive	52.33	DiseaseFree	G2	Stage IV	T3	N2	M0	NA
TCGA-CQ-7065	40	Male	53.48	Alive	7.56	Recurred or Progressed	G2	Stage II	T2	N0	M0	NA
TCGA-CQ-5327	61	Female	54.53	Alive	54.53	DiseaseFree	G2	Stage IV	T3	N2	M0	NA
TCGA-UF-A719	54	Male	54.63	Alive	54.63	DiseaseFree	G1	Stage III	T3	N0	M0	NA
TCGA-CV-6003	50	Female	54.7	Alive	54.7	DiseaseFree	G2	Stage II	T2	N0	M0	NA
TCGA-CN-4734	70	Male	55.52	Alive	55.52	DiseaseFree	G2	Stage II	T2	N0	M0	Negative
TCGA-CN-4723	67	Male	55.81	Alive	55.81	DiseaseFree	G2	Stage IV	T4	N0	M0	NA
TCGA-CV-7425	77	Female	56.44	Dead	NA	NA	G1	Stage III	T3	N0	M0	NA
TCGA-CN-5374	56	Female	56.9	Dead	44.97	Recurred or Progressed	G3	Stage IV	T2	N2	M0	NA
TCGA-CN-4735	52	Male	57.06	Alive	57.06	DiseaseFree	G3	Stage IV	T3	N2	M0	Negative
TCGA-CR-6467	59	Male	58.38	Alive	58.38	DiseaseFree	G3	Stage IV	T2	N2	M0	NA
TCGA-DQ-5624	43	Female	58.41	Alive	58.41	DiseaseFree	G2	Stage IV	T4	N1	M0	NA
TCGA-CV-A460	72	Male	60.38	Dead	46.81	Recurred or Progressed	G3	Stage IV	T3	N2	M0	NA
TCGA-CQ-5330	69	Female	62.32	Alive	62.32	DiseaseFree	G3	Stage III	T3	N1	M0	NA
TCGA-CV-6436	62	Male	62.39	Alive	62.39	DiseaseFree	G1	Stage III	T3	N0	M0	NA
TCGA-UF-A718	62	Male	64.75	Alive	64.75	DiseaseFree	G2	Stage IV	T4	N0	M0	NA
TCGA-BA-5558	65	Male	65.54	Alive	65.54	DiseaseFree	G1	Stage IV	T4	N1	M0	NA
TCGA-CV-6954	59	Male	65.77	Dead	NA	NA	G2	Stage IV	T4	N1	M0	NA
TCGA-CQ-6222	63	Male	66.23	Alive	66.23	DiseaseFree	G2	Stage IV	T3	N2	M0	NA
TCGA-CV-A461	65	Male	67.81	Dead	NA	NA	G2	Stage III	T3	N0	M0	NA
TCGA-CN-5361	80	Male	69.65	Dead	67.74	Recurred or Progressed	G2	NA	TX	NX	NA	NA
TCGA-CQ-7063	59	Female	70.07	Alive	38.11	Recurred or Progressed	G1	NA	NA	NA	NA	NA
TCGA-CN-5360	68	Male	71.25	Alive	71.25	DiseaseFree	G2	Stage IV	T4	N0	M0	NA
TCGA-P3-A5QA	41	Male	71.68	Alive	52.6	Recurred or Progressed	G3	Stage II	T2	N0	M0	NA
TCGA-CN-4741	75	Male	73.55	Alive	71.22	Recurred or Progressed	G2	Stage IV	T4	N0	M0	NA
TCGA-CV-5435	57	Male	76.18	Dead	9.33	Recurred or Progressed	G3	Stage IV	T4	N0	M0	NA
TCGA-CQ-7072	51	Male	77.5	Alive	77.5	DiseaseFree	G3	Stage IV	T4	N0	M0	NA
TCGA-CR-5243	51	Male	84.17	Alive	84.17	DiseaseFree	G3	Stage IV	T3	N2	M0	NA
TCGA-CV-7432	79	Male	84.43	Dead	NA	NA	G1	Stage III	T2	N1	M0	NA
TCGA-CV-5973	62	Female	86.76	Alive	86.76	DiseaseFree	G3	Stage III	T3	N0	M0	NA
TCGA-CV-7411	64	Female	89.26	Dead	NA	NA	G1	Stage IV	T4	N0	M0	NA
TCGA-CV-7238	69	Female	89.59	Alive	89.59	DiseaseFree	G2	Stage II	T2	N0	M0	NA
TCGA-CV-7250	64	Male	95.27	Dead	3.65	Recurred or Progressed	G1	Stage III	T3	N0	M0	NA
TCGA-CV-7091	54	Male	111.07	Alive	111.07	DiseaseFree	G3	Stage I	T1	N0	M0	NA
TCGA-CV-7183	53	Male	130.78	Alive	130.78	DiseaseFree	G1	Stage II	T2	N0	M0	NA
TCGA-CV-5430	61	Male	139.32	Alive	25.72	Recurred or Progressed	G3	Stage IV	T4	N2	M0	NA
TCGA-CV-6942	73	Female	140.67	Alive	140.67	DiseaseFree	G3	Stage II	T2	N0	M0	NA
